# Supplementary material
Source: MDPI journal article supplement (https://www.mdpi.com/2673-9410/2/3/15)
Supplement: s1 [file s1]

Archive with 8 entries (8 files):
- ._FigS3_revised.png
- ._FigS4_revised.png
- FigureS1.png
- FigureS2.png
- supplementary_Figures description_300522_FVW.pdf
- TableS1_Proteins identified_v1.xlsx
- TableS2_Chlamydomonas_TFs Targets_v1.xlsx
- TableS3_proteinGroups_NuclerProteome.xlsx
