# Supplementary material
Source: MDPI journal article supplement (https://www.mdpi.com/2673-9410/2/3/15)

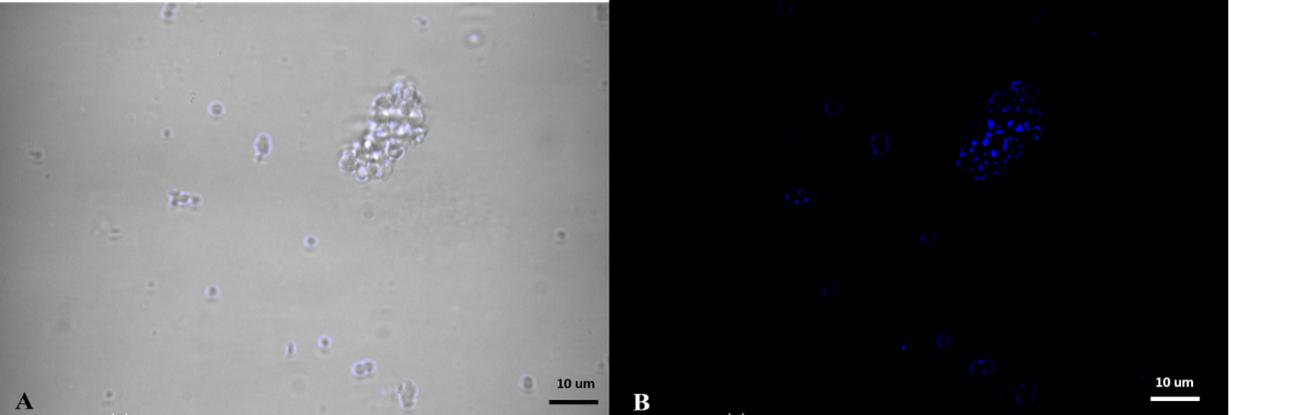

Supplement: s1 [file s1 › FigureS1.png]

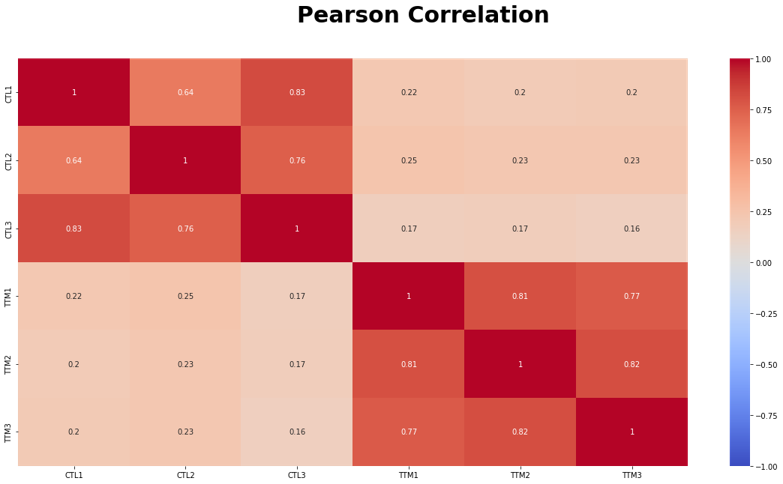

Supplement: s1 [file s1 › FigureS2.png]
